# Supplementary material
Source: ML conference proceedings conference paper supplement (https://openreview.net/forum?id=DbZDbg2z9q)
Supplement: supplementary_material [file attachment]

## A APPENDIX

### A.1 CONTROL EXPERIMENTS ON BIOMEDICAL BENCHMARKS

#### A.1.1 PERFORMANCE AND ANALYSIS

| Method         | TM | MedMCQA      | MedQA        | MMLU-Med     |
|----------------|----|--------------|--------------|--------------|
| ZeroShot       | ✗  | 62.06        | 67.16        | 80.06        |
| CoT            | ✗  | 60.91        | <b>69.99</b> | 76.70        |
| OntoRAG-simple | ✗  | <b>64.12</b> | 68.34        | 79.26        |
|                | ✓  | 61.80        | 68.11        | 80.01        |
| OntoRAG-HyA    | ✗  | <b>64.04</b> | 67.64        | 79.96        |
|                | ✓  | 62.13        | <b>69.36</b> | <b>80.65</b> |

Table 1: Performance comparison of methods on 3 biomedical benchmarks. TM denotes "*translation module*", referring to a variation of the fusion operator  $\mathcal{F}$  in which an LLM translates ontological context into natural language.

#### A.1.2 EFFECTS OF ONTOLOGICAL RELEVANCE.

We hypothesize that weak performance in some areas when using OntoRAG might be due to vocabulary discrepancies as an effect of decreased ontological relevance. To assess this, we conduct an analysis where for each question in a given benchmark, the number of retrieved concepts from an ontology is computed, and the mean across the benchmark is correlated to performance (accuracy), for a given method. That is, each ontorag variation contributes one point to the correlation analysis. The goal is to determine whether high ontological relevance correlates with higher accuracy.

The results in Table 2 indicate an overall positive and usually strong correlation between ontological relevance and downstream performance.

| Benchmark | Correlation |
|-----------|-------------|
| MedQA     | 0.7852      |
| MMLU-Med  | 0.7506      |
| MedMCQA   | 0.1018      |

Table 2: Correlation values for different benchmarks

### A.2 MEDICAL ONTOLOGIES

We first evaluate our methodology by first gauging its performance on a well known LLM question and answer (QA) benchmark, Multi-Subject Multi-Choice Dataset for Medical domain (MedMCQA) (Pal et al., 2022). This is a popular benchmark for evaluating LLM performance on multiple choice questions from various areas in the medical domain. Questions from this dataset were first divided based on their medical domain (dentistry, pediatrics, etc.) which then guided the selection of ontologies to place into the OntoRAG pipeline. The selected ontologies were limited to a biochemical ontology (<https://bioportal.bioontology.org/ontologies/REX>) a general medical term/ diagnostic ontology (<https://bioportal.bioontology.org/ontologies/SNOMEDCT>), and the widely-used gene ontology (GO) Aleksander et al. (2023) in an attempt to cover most of the concepts present in the QA dataset. These ontologies were also chosen due to their public availability and their professional quality. The benchmark was curated to only include concepts that appear within the utilized ontologies. The final dataset contained around 4000 questions with the number of questions ranging from 27 to 400 for each medical domain. As with the results presented in the main document, the OntoRAG system offers similar or improved performance over the baseline zero-shot and CoT methods, with significant improvements in the areas of genetics, anatomy, and microbiology. These improvements correlate with the fact that we used ontologies most relevant to these fields.

| No. Entries | Question Class           | ZeroShot    | CoT         | OntoRAG     |
|-------------|--------------------------|-------------|-------------|-------------|
| 405         | Unknown                  | <b>0.83</b> | 0.78        | 0.82        |
| 311         | Biochemistry             | 0.81        | 0.78        | <b>0.83</b> |
| 283         | Physiology               | <b>0.82</b> | 0.79        | <b>0.82</b> |
| 130         | Medicine                 | <b>0.88</b> | 0.83        | 0.86        |
| 92          | Preventive Medicine      | <b>0.75</b> | 0.65        | 0.71        |
| 88          | Microbiology             | 0.58        | 0.57        | <b>0.61</b> |
| 80          | Gynaecology & Obstetrics | <b>0.82</b> | 0.78        | <b>0.82</b> |
| 77          | Anatomy                  | 0.77        | 0.77        | <b>0.91</b> |
| 72          | Pharmacology             | 0.78        | <b>0.79</b> | 0.76        |
| 68          | Pediatrics               | 0.85        | <b>0.87</b> | 0.85        |
| 49          | Psychiatry               | 0.73        | <b>0.76</b> | 0.73        |
| 33          | Surgery                  | <b>0.73</b> | 0.67        | 0.61        |
| 23          | Dental                   | <b>0.74</b> | 0.65        | <b>0.74</b> |
| 18          | Genetics                 | 0.83        | 0.78        | <b>0.89</b> |
| 18          | Orthopaedics             | <b>0.83</b> | 0.67        | <b>0.83</b> |
| 16          | Neurology                | <b>0.88</b> | 0.81        | 0.81        |

Table 3: Accuracy of OntoRAG against baselines on MMLU-Med, by question class. The table shows the accuracy of each method by type of question. OntoRAG-HyA-TM was used here.

### A.3 ONTORAG DETAILS

OntoRAG is implemented using the DSPy library Khattab et al. (2023). The library abstracts the interface with an LLM into Signatures and Modules. The Signatures abstract the prompting of the LLM into classes with Input and Output properties, while the Modules define the flow of information that the pipeline implements.

The below Module is defined as the OntoRAG base module, and defines some standard routines used in every other sub-module used in this work.

Figure 5: OntoRAG implementations used in this work. Only *Simple* and *HyQ* are shown here. These represent variations in the retrieval type (i.e. direct or hypothetical answer). Variations in the fusion operator F are defined as part of the BaseOntoRAG class, see Appendix A.3.

```
class ORAG_Simple(BaseOntoRAG):
    """Simple Ontorag"""
    def forward(self, q: str):
        ctxt = self.retr(q)
        answer = self.predictor(
            question=q,
            context=ctxt
        )
        return answer
```

OntoRAG Simple

```
class ORAG_HyA(BaseOntoRAG):
    """Ontorag with Hypot. answer
    ↪ """
    def forward(self, q: str):
        # Hypothetical answer
        ctxt0 = self.retr(q)
        hans = self.hya(
            question=q,
            context=ctxt0
        )
        # Query concepts in HyA
        ctxt1 = self.retr(
            hans.answer
        )
        answer = self.predictor(
            question=q,
            context=ctxt1
        )
        return answer
```

OntoRAG-HyA

---

**Algorithm 1** OntoRAG base class.

---

```

972
973
974 class BaseOntoRAG(dspy.Module):
975     retriever: dspy.Retrieve
976     ontoretriever: OntoRetriever
977
978     def forward(self, query: str) -> dspy.Prediction:
979         """Forward pass of the OntoRAG pipeline."""
980         pass
981
982     def retrieve(self, query: str, ctxt_doc: str|None) -> str:
983         """Retrieve and format."""
984         ctxt_doc, ctxt_onto = "", ""
985
986         if ctxt_doc is None:
987             ctxt_dict = self.retrieve_doc(query)
988             ctxt_doc = self.format_context(ctxt_dict)
989
990         if self.ontoretriever.ontology.ontologies:
991             ctxt_ontoj = self.ontoretriever(query)
992             ctxt_onto = self.format_onto_context(ctxt_ontoj)
993
994         ctxt = self.fuse_contexts(ctxt_doc, ctxt_onto)
995         return ctxt
996
997     def format_context(self, context: List[Dict]) -> str:
998         """Format context."""
999         contexts = [p["text"] for c in context for p in c["passages"]]
1000         return "\n".join(deduplicate(contexts))
1001
1002     def format_onto_context(self, context: List[Dict]) -> str:
1003         """Format ontology context."""
1004         return json.dumps(context, indent=2)
1005
1006     def fuse_contexts(self, ctxt_doc: str, ctxt_onto: str) -> str:
1007         """Fuse document and ontology contexts."""
1008         return ctxt_doc + ctxt_onto

```

---

A specific implementation of OntoRAG looks as follows: First, a Signature is defined, where inputs and outputs are defined.

The Modules are written to handle the inputs in the Signature, and to produce the outputs.

### A.3.1 ONTOLOGY RETRIEVAL OPERATOR

The operator  $\mathcal{O}$  defined in eq. 2, works by first extracting concepts from a statement  $s$  and returning the most similar ontological concepts  $\{o\}$  in the ontology. The concepts are retrieved by 1. extracting concepts from the input query, and 2. retrieving ontological context from each of those concepts. The complete ontology retrieval pipeline is illustrated in pseudo-code 4.

In our implementation, retrieval works by extracting concepts using the spacy "en\_core\_web\_sm" parser. The pipeline then searches in the loaded ontology, and if found retrieves the parents, children, as well as the definition, if any.

1025

---

**Algorithm 2** MedQnA: Medical Question Answering Signature

---

```

class MedQnA(dspy.Signature):
    """Answer a question with a detailed response based on the
    given context. If the context is not relevant or there is no
    context, answer based on
    your knowledge."""
    context: str = dspy.InputField(
        desc="Context: This information shows the relationships between
        relevant concepts:"
    )
    question: str = dspy.InputField(
        desc="Here is the question you need to answer:"
    )
    reasoning: str = dspy.OutputField(
        desc="Reasoning: Let's think step by step in order to ${reasoning}"
    )
    choice_answer: str = dspy.OutputField(desc="Answer: ${answer}")

```

---

**Algorithm 3** SimpleORAG: Simple Ontology-enhanced Retrieval-Augmented Generation

---

```

class SimpleORAG(BaseOntoRAG):
    def __init__(
        self,
        ontology: Union[str, OntoRetriever],
        context: None|str,
    ):
        super().__init__()
        self.predictor = dspy.Predict(MedQnA)
        if isinstance(ontology, str):
            self.ontoretriever = OntoRetriever(ontology_path=ontology)
        else:
            self.ontoretriever = ontology
    def forward(self, qprompt: str) -> dspy.Prediction:
        context = self.retrieve(qprompt)
        answer = self.predictor(question=qprompt, context=context)
        return answer

```

---

## A.3.2 WORKING EXAMPLE OF ONTORAG.

Here we need to show an example of a variation of ontorag.

## A.4 ONTOGEN DETAILS

## A.4.1 SELF CONSISTENCY

The improvement of LLMs' capabilities to generate high-quality, hallucination-free answers is currently a highly active area of research. Many generic methods have been proposed that improve LLMs outputs without training data, fine-tuning or reinforcement learning, which includes, among others, self-consistency Wang et al. (2022), debating LLMs Du et al. (2023), and self-refinement Madaan et al. (2024). Research by Huang et al. Huang et al. (2023) demonstrates that self-consistency offers competitive results while being more computationally efficient compared to other methods. Therefore, in this work, self-consistency is used to improve the quality of answers from a LLM. As utilized in our approach, self-consistency can be defined as:

**Algorithm 4** Retrieval of ontological context

---

```

1080 1: procedure PROCESSQUERY(query)
1081 2:    $recognizedConcepts \leftarrow RecognizeConcepts(query)$ 
1082 3:    $output \leftarrow \emptyset$ 
1083 4:   for each  $ontology, concepts$  in  $recognizedConcepts$  do
1084 5:     for each  $concept$  in  $concepts$  do
1085 6:        $context \leftarrow GetOntologicalContext(concept, ontology)$ 
1086 7:        $output[ontology][concept] \leftarrow context$ 
1087 8:   return  $output$ 
1088
1089 9: procedure RECOGNIZECONCEPTS(text)
1090 10:   $doc \leftarrow NLP(text)$ 
1091 11:  for each  $token$  in  $doc$  do
1092 12:    if  $token$  matches any ontology pattern then
1093 13:       $concept \leftarrow token.text$ 
1094 14:       $ontology \leftarrow DetermineOntology(concept)$ 
1095 15:       $recognizedConcepts[ontology].add(concept)$ 
1096 16:  return  $recognizedConcepts$ 
1097
1098 17: procedure GETONTOLOGICALCONTEXT(concept, ontology)
1099 18:   $class \leftarrow ontology.search(label = concept)$ 
1100 19:   $context \leftarrow \{$ 
1101 20:     $"label" : class.label,$ 
1102 21:     $"definition" : class.definition,$ 
1103 22:     $"parents" : class.superclasses(),$ 
1104 23:     $"children" : class.subclasses()$ 
1105 24:   $\}$  return  $context$ 

```

---

**Definition A.1** Let  $a_1, a_2, \dots, a_n \in \mathbb{A}$  be the answers to a given prompt  $p$  generated by a LLM, and  $r_i$  the set of tokens generated before the answer  $a_i$ .

Self-Consistency (SC) applies a marginalization over  $r_i$  by taking the majority vote of the answers  $a_i$ , i.e.  $a = \arg \max_{a_i} \sum_{j=1}^n \mathbb{1}(a_i = a_j)$ , thus giving as a final answer the most “consistent” answer generated by the LLM.

It is important to note that self-consistency was initially proposed to enhance Chain of Thought (CoT) reasoning Wei et al. (2022) in LLMs Wang et al. (2022), to improve performance on generalized problem-solving tasks. In our work, we leverage the generalizability of self-consistency to improve the quality of our knowledge schemas reconstruction.

#### A.4.2 VOCABULARY EXTRACTION

After each iteration with the LLM, when it has extracted a list of concepts, a verification step is performed that consists of performing a string search of each of the list terms, in the original sentence. Terms pass this filter only if they are contained in the original sentence. With this process, we terms that originate as a result of hallucinations from the LLM used.

#### A.4.3 CATEGORIES GENERATION

During the *refinement* step, the LLM is prompted to curate a list of the most frequent categories extracted from the previous step. SC is applied here by generating many answers from the same prompt, and taking the majority vote of the categories extracted. While this provides a more robust list of categories, it is important to note that the correctness of an ontology is dependent on the downstream application it is intended for. Therefore, human involvement may be required in this step to select or exclude certain categories in order to align it with the downstream application. The final list of categories is then used as a seed for extracting the entire taxonomy, making it crucial to ensure the list is of high quality.

In the case of SACs ontology, the generated list of categories, obtained by majority voting was: *Characterization, Physical properties, Synthesis methods, Reaction mechanisms, Structure, Applications, Reactions* and *Support*. The manual curation performed in this step involved selecting the following additional categories from the pool of generated categories, so as to make the ontology more aligned with our chemistry knowledge: *Catalytic performance, Preparation methods, Theory and modelling, and Materials*.

#### A.4.4 ALGORITHM FOR TAXONOMY GENERATION

---

##### Algorithm 5 Iterative and Incremental Top-Down Taxonomy Generation

---

**Input:** Papers  $\mathcal{P}$ , Vocabulary  $\mathcal{V}$ , Initial Taxonomy  $\mathcal{T}^{(0)}$   
**Output:** Reconstructed Taxonomy after  $K$  iterations  $\mathcal{T}^{(K)}$

```

1: for  $k = 1, \dots, K$  do
2:    $\mathcal{T}^{(k)} \leftarrow \mathcal{T}^{(k-1)}$ 
3:   for  $P_i \in \mathcal{P}$  do
4:      $R_i \leftarrow \text{query\_relationships}(P_i, V_i, \mathcal{T}^{(k)})$ 
5:     for  $(s, t) \in R_i$  do
6:       if  $\text{is\_valid}((s, t), \mathcal{T}^{(k)})$  then
7:          $\mathcal{T}^{(k)} \leftarrow \mathcal{T}^{(k)} \cup \{(s, t)\}$ 
8: return  $\mathcal{T}^{(K)}$ 

```

---

Where,

- `query_relationships`: Extracts *isA* relationships  $(s, t)$  from paper  $P_i$ , where  $s \in \mathcal{C}(\mathcal{T}^{(k)})$  is a term in the current taxonomy  $\mathcal{T}^{(k)}$ , and  $t \in V_i$ . This function aims to place each term into the existing taxonomy, potentially returning multiple relationships per term.
- `is_valid`: Ensures no loops are created in the taxonomy when inserting a new relationship.

In our implementation, `query_relationships` utilizes an LLM prompted with the paper content, the current taxonomy terms, and the vocabulary to be queried. An example prompt and response can be found in Appendix A.6. To enhance the quality of the generated taxonomy and reduce hallucinations, SC is applied in this step by generating multiple answers from the same prompt and taking the majority voting as the final answer.

#### A.4.5 EXPERT EVALUATION

In order to evaluate the quality of the generated ontology, a panel of two experts was assembled to assess the taxonomical relationships. The experts were tasked with randomly sampling relationships from various iterations of the ontology and determining whether each sampled relationship was correct according to the context provided for such relationship, in this case, the corresponding paper. According to the experts, on average at least 64.5% of the sampled relationships were considered correct. While this indicates a majority of accurate relationships, it also suggests room for improvement in the ontology generation process. Upon analysis of the incorrect relationships, the experts identified as potential improvements the removal of semantically similar concepts, which might appear repeated in different parts of the structure, and the need to provide a more specific context for the relationships, in order to reduce ambiguity.

#### A.4.6 SACs ONTOLOGY EXAMPLE

To provide a concrete example of how the ontology is able to capture meaningful relationships, below two examples are provided corresponding to the *synthesis methods* (left) and *CO2 reduction reactions* (right) branches for both the ontologies generated with Claude 3.5 Sonnet and Llama3.1:70b. Here it can be seen that both ontologies are able to capture meaningful synthesis methods for SACs that appear in the literature. It can be seen that, generally there is an agreement in the synthesis methods identified in both ontologies. It can be highlighted, however, that the Llama-generated ontology contains a larger number of false-positive synthesis methods (e.g. *Methodology, Synthesis, Strategies*), which

1188 explains the larger number of terms included in this ontology. Regarding the *CO2 reduction* branch,  
 1189 one can notice that each ontology contains semantically similar terms (e.g. *Carbon dioxide reduction*  
 1190 *reaction* and *CO2 reduction reaction*). While this does not affect the downstream performance of  
 1191 the ontology, it creates unnecessary redundancies in the structure. Additionally, it can be seen that,  
 1192 in the Llama-generated ontology, *CO2 reduction* has not been classified as a separate branch, but  
 1193 instead, it is contained inside the *Reactions* branch, without this being necessarily incorrect. Finally,  
 1194 as it happened with the *synthesis methods* branch, the Llama-generated ontology contains evident  
 1195 false-positives (e.g. *CO2 molecules, dioxide*), which did not appear in the Claude-generated ontology.  
 1196

### 1197 Example SACs Ontology (Claude 3.5 Sonnet)

1198

```

1199 Thing
1200 └─ Synthesis methods
1201   └─ Catalyst synthetic strategies
1202     └─ Two-step approach
1203     └─ Ni-TAPc anchoring strategies
1204     └─ Pyrolysis procedure
1205     └─ Bimodal template based synthesis strategies
1206     └─ Multistep pyrolysis process
1207     └─ Multistep pyrolysis method
1208     └─ Wet chemistry methods
1209     └─ Pyrolysis
1210     └─ Atomic layer deposition
1211     └─ Pyrolysis process
1212     └─ NH3 atmosphere annealing
1213     └─ Co precipitation
1214     └─ Annealing
1215     └─ Lyophilization
1216     └─ Galvanic replacement reaction
1217     └─ Synthetic process
1218     └─ Incipient wetness impregnation
1219     └─ Synthesis approach
1220     └─ Silica templating
1221     └─ Synthetic approaches
1222     └─ Synthesis
1223     └─ Synthesis condition
1224     └─ Heteroatom doped
1225     └─ Reduction temperature
1226     └─ Hydrothermal ethanol reduction method
1227     └─ High-temperature pyrolysis
1228     └─ Immobilization via functional group
1229     └─ Dendrimer encapsulation
1230     └─ Hydrothermal treatment
1231     └─ Impregnation methods
1232     └─ Wet impregnation
1233     └─ Sol-gel approach
1234     └─ Self-assembly route
1235     └─ Synthetic strategies
1236     └─ High-temperature self-assembly route
  
```

```

1237 Thing
1238 └─ Reactions
1239   └─ CO2 reduction
1240     └─ Electrochemical carbon dioxide reduction
1241     └─ Carbon dioxide reduction reaction
1242     └─ CO2 reduction reaction (CO2RR)
1243     └─ Electrochemical CO2-to-CO conversion
1244     └─ Electrochemical CO2 reduction reaction (CO2RR)
1245     └─ CO2 conversion
1246     └─ eCO2RR
1247     └─ CO2 electroreduction
1248     └─ Photocatalytic CO2 conversion
1249     └─ Photocatalytic CO2 reduction reaction
1250     └─ CO2 to CO conversion
1251     └─ Photocatalytic reduction
1252     └─ CO2 photoreduction
1253     └─ Catalytic CO2 conversion
1254     └─ CO2 hydrogenation
1255     └─ Electroreduction
  
```

### 1224 Example SACs Ontology (Llama 3.1:70b)

1225

```

1226 Thing
1227 └─ Synthesis methods
1228   └─ Catalyst synthetic strategies
1229   └─ Nanoconfined ILs strategy
1230   └─ Solid liquid interface engineering
1231   └─ Confinement
1232   └─ Synthesis
1233   └─ Strategies
1234   └─ Postprocessing solution treatments
1235   └─ Acidic leaching
1236   └─ Sol-gel approach
1237   └─ Incipient wetness impregnation
1238   └─ Annealing
1239   └─ Lyophilization
1240   └─ Galvanic replacement reaction
1241   └─ Atomic layer deposition
1242   └─ Co-precipitation
1243   └─ Alloying
1244   └─ Synthetic process
1245   └─ NH3 atmosphere annealing
1246   └─ Hydrothermal treatment
1247   └─ Oxychlorination
1248   └─ Iodo hydrocarbon treatment
1249   └─ NO/CO treatment
1250   └─ Dendrimer encapsulation
1251   └─ Repetitive oxidation and reduction
1252   └─ Immobilization via functional group
1253   └─ Pyrolysis procedure
1254   └─ Bimodal template based synthesis strategies
  
```

```

1255 Thing
1256 └─ Reactions
1257   └─ CO2 molecules
1258   └─ CO2 reduction
1259   └─ Electrochemical CO2 reduction reaction (CO2RR)
1260   └─ Carbon dioxide
1261   └─ CO2 emissions
1262   └─ CO2 reduction reaction (CO2RR)
1263   └─ Anthropogenic CO2 emissions
1264   └─ Carbon dioxide reduction reaction
1265   └─ Electrochemical carbon dioxide reduction
1266   └─ Photocatalytic CO2 reduction reaction
1267   └─ CO2 to CO conversion
1268   └─ dioxide
1269   └─ eCO2RR
1270   └─ CO2 electroreduction
1271   └─ CO2 photoreduction
1272   └─ CO2 conversion
1273   └─ CO2 activation
1274   └─ Electrochemical CO2 to CO conversion
1275   └─ <remaining omitted for clarity>
  
```

|      |   |                                              |
|------|---|----------------------------------------------|
| 1242 | — | Calcination                                  |
| 1243 | — | Wet impregnation                             |
| 1244 | — | Reduction                                    |
| 1245 | — | Impregnation methods                         |
| 1246 | — | Rational design                              |
| 1247 | — | Two-step approach                            |
| 1248 | — | Ni-TAPc anchoring strategies                 |
| 1249 | — | High-temperature aging                       |
| 1250 | — | Synthetic strategies                         |
| 1251 | — | Scale up flexibility                         |
| 1252 | — | Low cost                                     |
| 1253 | — | Self-assembly route                          |
| 1254 | — | High-temperature self-assembly route         |
| 1255 | — | Aging treatment                              |
| 1256 | — | Synthesis approach                           |
| 1257 | — | Acid wash steps                              |
| 1258 | — | Silica templating                            |
| 1259 | — | Sacrificial Zn based metal organic framework |
| 1260 | — | Synthetic approaches                         |
| 1261 | — | NaOH etching                                 |
| 1262 | — | Pyrolysis                                    |
| 1263 | — | Rational identification                      |
| 1264 | — | Synthesis condition                          |
| 1265 | — | High temperature pyrolysis                   |
| 1266 | — | Hydrothermal ethanol reduction method        |
| 1267 | — | Catalyst design                              |
| 1268 | — | Ionic exchange                               |
| 1269 | — | Modulation                                   |
| 1270 | — | Composition evolution                        |
| 1271 | — | Metal salt                                   |
| 1272 | — | Structure performance relationships          |
| 1273 | — | o phenylenediamine                           |
| 1274 | — | Ultrahigh vacuum surface science procedures  |
| 1275 | — | Multistep pyrolysis process                  |
| 1276 | — | Wet-chemistry methods                        |
| 1277 | — | Multistep pyrolysis method                   |
| 1278 | — | Physical techniques                          |
| 1279 | — | Mass-selected soft-landing                   |
| 1280 | — | Pyrolysis process                            |
| 1281 | — | Atom beams                                   |
| 1282 | — | Growth mechanism                             |
| 1283 | — | Post treatment processes                     |
| 1284 | — | Reconnaissance study                         |
| 1285 | — | Ketoamine condensation reaction              |
| 1286 | — | Multiscale tuning                            |
| 1287 | — | Ni salts                                     |
| 1288 | — | Methodology                                  |
| 1289 | — | Ni precursor                                 |
| 1290 | — | Formation mechanism                          |
| 1291 | — | Distribution                                 |
| 1292 | — | Metal precursor                              |

## 1275 A.5 SACBENCH: BENCHMARK FOR SAC SYNTHESIS PROCEDURES

1277 SACBench is a comprehensive benchmark designed to evaluate the performance of systems that  
 1278 generate experimental procedures for the synthesis of Single-Atom Catalysts (SACs). The benchmark  
 1279 consists of 50 input-output pairs, where the input specifies a desired SAC and the output is the correct  
 1280 synthesis procedure.

1281 The evaluation metrics used aim to assess the validity and correctness of a generated synthesis  
 1282 suggestion, in chemically meaningful terms.

1283 Some metrics include:

- 1285 1. Procedure Accuracy: Measures the overall correctness of the generated procedure.
- 1286 2. Procedure Completeness: Assesses how comprehensive the generated procedure is compared  
 1287 to the reference.
- 1288 3. Procedure Order: Evaluates the correct sequencing of steps in the generated procedure.
- 1289 4. Chemical Identification: Includes recall, precision, F1 score, and accuracy for identifying  
 1290 correct chemicals in the procedure.
- 1291 5. Metal Identification: Measures recall, precision, F1 score, and accuracy for correctly  
 1292 identifying the metal component of the SAC.
- 1293 6. Support Identification: Evaluates recall, precision, F1 score, and accuracy for correctly  
 1294 identifying the support material in the SAC synthesis.



1296 Figure 6 shows some general statistics about the test dataset, and the co occurrences between different  
 1297 variables.  
 1298

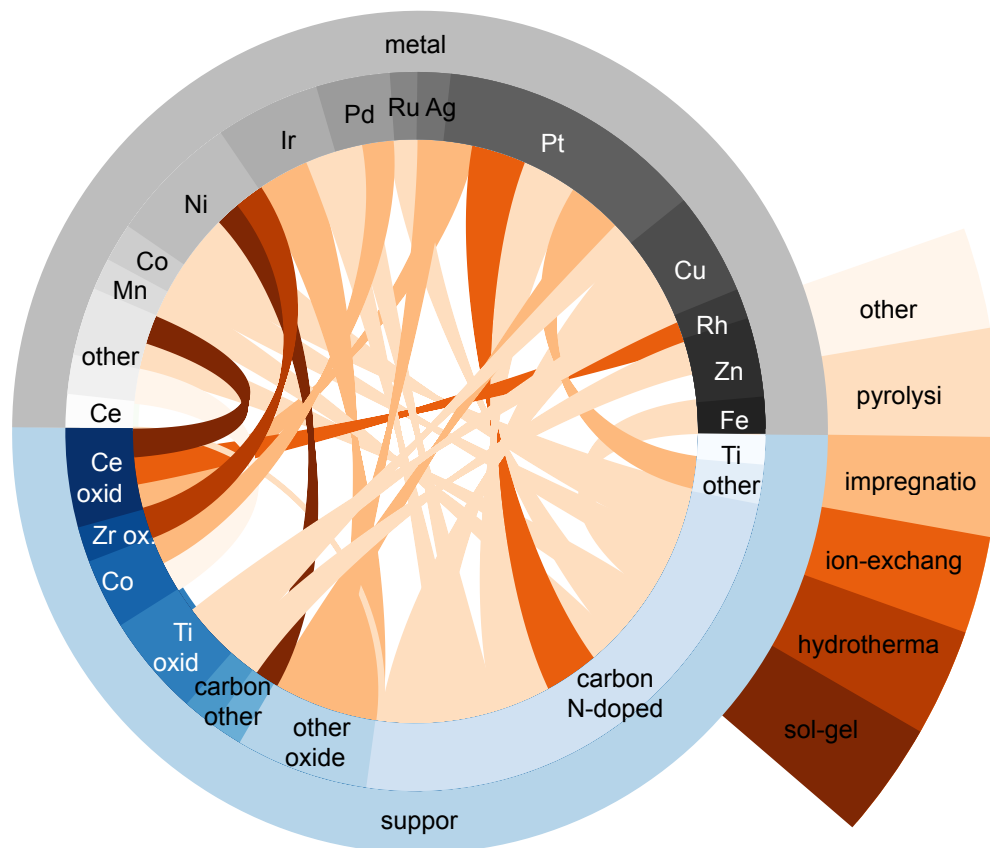

1328 Figure 6: Descriptive statistics of the benchmark created for this work.  
 1329

### 1330 A.5.1 SAC RESEARCH PAPERS CORPUS

1331  
 1332 The corpus of 500 recent research papers on Single-Atom Catalysts (SACs) used for ontology  
 1333 generation includes publications from top journals in catalysis and materials science from the past  
 1334 5 years. The papers cover various aspects of SACs, including synthesis methods, characterization  
 1335 techniques, and applications.  
 1336

1337 The research papers were obtained from Wiley Journals through Wiley’s official API (Wiley-API  
 1338 (2024)).  
 1339

### 1340 A.6 PROMPT EXAMPLE

1341 Here’s an example prompt used in the `query_relationships` function for taxonomy extraction:  
 1342

1343 Given the following paper content, current taxonomy terms, and vocabulary  
 1344 ↪ to be queried, please identify ‘isA’ relationships between terms  
 1345 ↪ in the vocabulary and terms in the current taxonomy. Ensure that  
 1346 ↪ each relationship is supported by evidence from the paper content.

1347 Paper content:

1348 In the field of catalysis, single-atom catalysts represent a specialized  
 1349 ↪ form of catalysts, emerging from the parent concept of a catalyst  
 ↪ but with isolated active sites at the atomic level. Their creation

1350 ↪ often involves various synthesis methods, with wet impregnation  
 1351 ↪ being a common technique to distribute the active metal atoms  
 1352 ↪ evenly on a support. Once synthesized, these catalysts can be  
 1353 ↪ characterized using X-ray absorption spectroscopy.

1354 Current taxonomy terms:  
 1355 - Reactions  
 1356 - Catalyst  
 1357 - Materials  
 1358 - Synthesis method  
 1359 - Characterization technique  
 1360 - Preparation method

1361 Vocabulary to be queried:  
 1362 - Single-atom catalyst  
 1363 - Wet impregnation  
 1364 - X-ray absorption spectroscopy

1365 Please **format** your response as a **list** of relationships **in** the form (  
 1366 ↪ parent\_term, child\_term), where parent\_term **is from** the current  
 1367 ↪ taxonomy **and** child\_term **is from** the vocabulary to be queried."

Listing 1: Prompt Example

1370 Here **is** the **list** of relationships:  
 1371  
 1372 (Catalyst, Single-atom catalyst)  
 1373 (Synthesis method, Wet impregnation)  
 1374 (Characterization technique, X-ray absorption spectroscopy)

Listing 2: Response Example

## 1377 A.7 DOWNSTREAM EVALUATION OF ONTOLOGIES

1378 Evaluating the quality of generated ontologies requires either careful expert evaluation, typically  
 1379 involving committees of experts in the field Keet (2018), or downstream applications that use them as  
 1380 an integral part of the pipeline and provide quantitative result of some sort.  
 1381

1382 In our work, we opt for the downstream application on SAC Synthesis to compare two SAC ontologies  
 1383 generated with OntoGen, using LLMs of different capacity, namely Claude-3.5-Sonnet, and Llama-  
 1384 3.1-70B. We compare two variants of OntoRAG-simple: with and without a Translation Module.  
 1385 Additionally we include the results of the ZeroShot and CoT baselines for comparison. All the results  
 1386 in Tables 4 to 6 are results with gpt-4o-mini as LLM. The metrics used are defined in Appendix A.5.

Table 4: ZeroShot (Baseline)

| ontology | Procedure    |          |          | Chemicals<br>accuracy | Metal<br>accuracy | Support<br>accuracy |
|----------|--------------|----------|----------|-----------------------|-------------------|---------------------|
|          | completeness | order    | accuracy |                       |                   |                     |
| Claude   | 0.725011     | 0.400722 | 0.055564 | 0.130818              | 0.490196          | 0.549020            |
| Llama    | 0.725011     | 0.400722 | 0.055564 | 0.130818              | 0.490196          | 0.549020            |

Table 5: CoT (Baseline)

| ontology | procedure    |          |          | chemicals<br>accuracy | metal<br>accuracy | support<br>accuracy |
|----------|--------------|----------|----------|-----------------------|-------------------|---------------------|
|          | completeness | order    | accuracy |                       |                   |                     |
| Claude   | 0.570561     | 0.321268 | 0.048420 | 0.141569              | 0.578431          | 0.490196            |
| Llama    | 0.570561     | 0.321268 | 0.048420 | 0.141569              | 0.578431          | 0.490196            |

## 1403 A.8 SACBENCH RESULTS & ANALYSIS

1404  
1405  
1406  
1407  
1408  
1409  
1410  
1411  
1412  
1413  
1414  
1415  
1416  
1417  
1418  
1419  
1420  
1421  
1422  
1423  
1424  
1425  
1426  
1427  
1428  
1429  
1430  
1431  
1432  
1433  
1434  
1435  
1436  
1437  
1438  
1439  
1440  
1441  
1442  
1443  
1444  
1445  
1446  
1447  
1448  
1449  
1450  
1451  
1452  
1453  
1454  
1455  
1456  
1457

Table 6: OntoRAG-simple

| ontology | procedure       |          |          | chemicals       | metal           | support         |
|----------|-----------------|----------|----------|-----------------|-----------------|-----------------|
|          | completeness    | order    | accuracy | accuracy        | accuracy        | accuracy        |
| Claude   | <b>0.577304</b> | 0.330314 | 0.044630 | 0.130324        | <b>0.607843</b> | <b>0.490196</b> |
| Llama    | 0.536076        | 0.337008 | 0.038061 | <b>0.138353</b> | 0.509804        | 0.431373        |

Table 7: OntoRAG-simple-tm

| ontology | procedure       |          |          | chemicals | metal           | support         |
|----------|-----------------|----------|----------|-----------|-----------------|-----------------|
|          | completeness    | order    | accuracy | accuracy  | accuracy        | accuracy        |
| Claude   | <b>0.613198</b> | 0.364592 | 0.049093 | 0.132388  | <b>0.705882</b> | 0.568627        |
| Llama    | 0.593519        | 0.369136 | 0.049502 | 0.138899  | 0.647059        | <b>0.607843</b> |

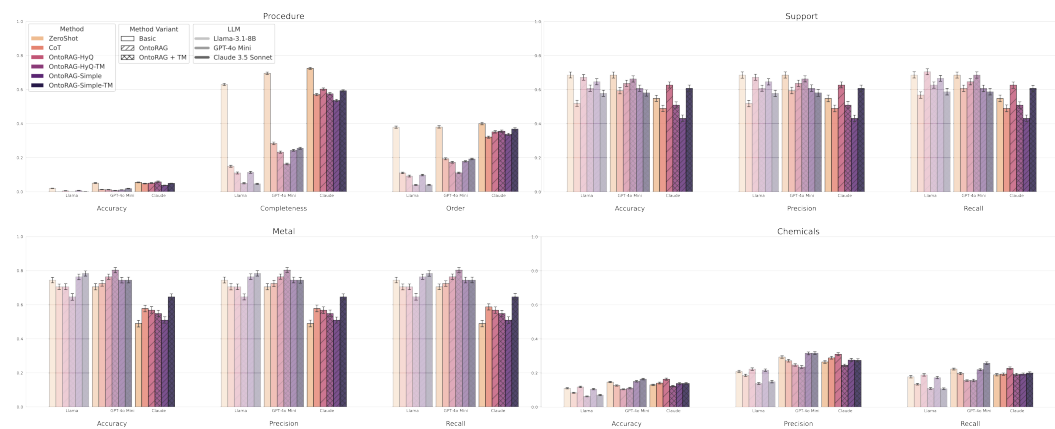

Figure 7: Complete results of multiple methods, and LLMs, on multiple metrics of the SACBench benchmark.

1458  
 1459  
 1460  
 1461  
 1462  
 1463  
 1464  
 1465  
 1466  
 1467  
 1468  
 1469  
 1470  
 1471  
 1472  
 1473  
 1474  
 1475  
 1476  
 1477  
 1478  
 1479  
 1480  
 1481  
 1482  
 1483  
 1484  
 1485  
 1486  
 1487  
 1488  
 1489  
 1490  
 1491  
 1492  
 1493  
 1494  
 1495  
 1496  
 1497  
 1498  
 1499  
 1500  
 1501  
 1502  
 1503  
 1504  
 1505  
 1506  
 1507  
 1508  
 1509  
 1510  
 1511

### Distributions of length of response, by method

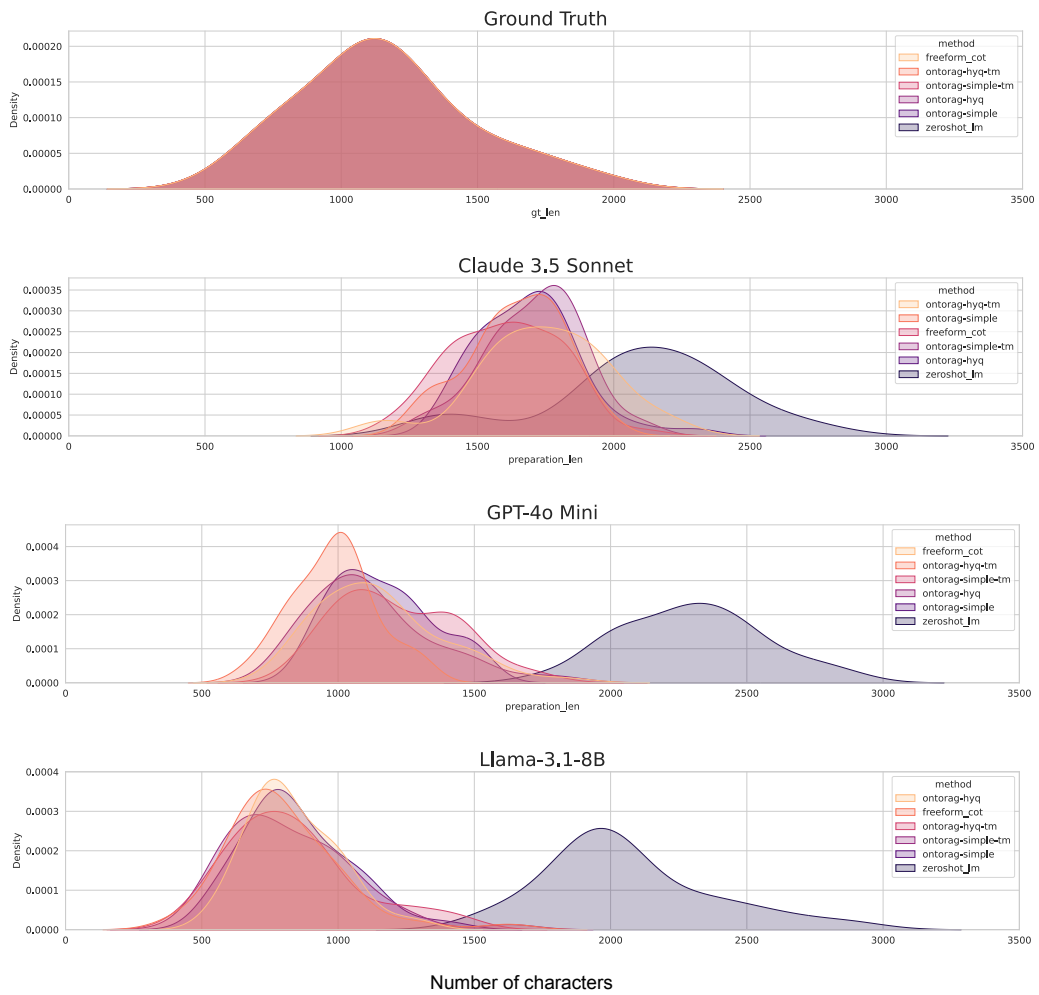

Figure 8: Distribution of response length for each LLM, by method. The plot shows a clear difference between the ZeroShot responses as compared to the rest of the methods.
